# Supplementary material
Source: MDPI journal article supplement (https://www.mdpi.com/2076-3417/10/6/2070)
Supplement: s1 [file s1]

Supplementary Table I. Main characteristics of the evaluated microphones

|     | Microphone        | Type      | Frequency Response | Sensitivity  |       |
|-----|-------------------|-----------|--------------------|--------------|-------|
|     |                   |           |                    | dB re 1 V/Pa | mV/Pa |
| GRO | GRAS AC40         | Condenser | 4 Hz – 40 kHz      | -38.4        | 12.5  |
| BHO | Behringer ECM8000 | Condenser | 15 Hz – 20 kHz     | -39.2        | 11.0  |
| SH7 | Shure SM57        | Dynamic   | 40 Hz – 15 kHz     | -55.9        | 1.6   |
| BHX | Behringer XM8500  | Dynamic   | 50 Hz – 15 kHz     | -70.4        | 0.3   |
| BCT | BCT MD1           | Dynamic   | 100 Hz – 10 kHz    | -53.0        | 2.2   |

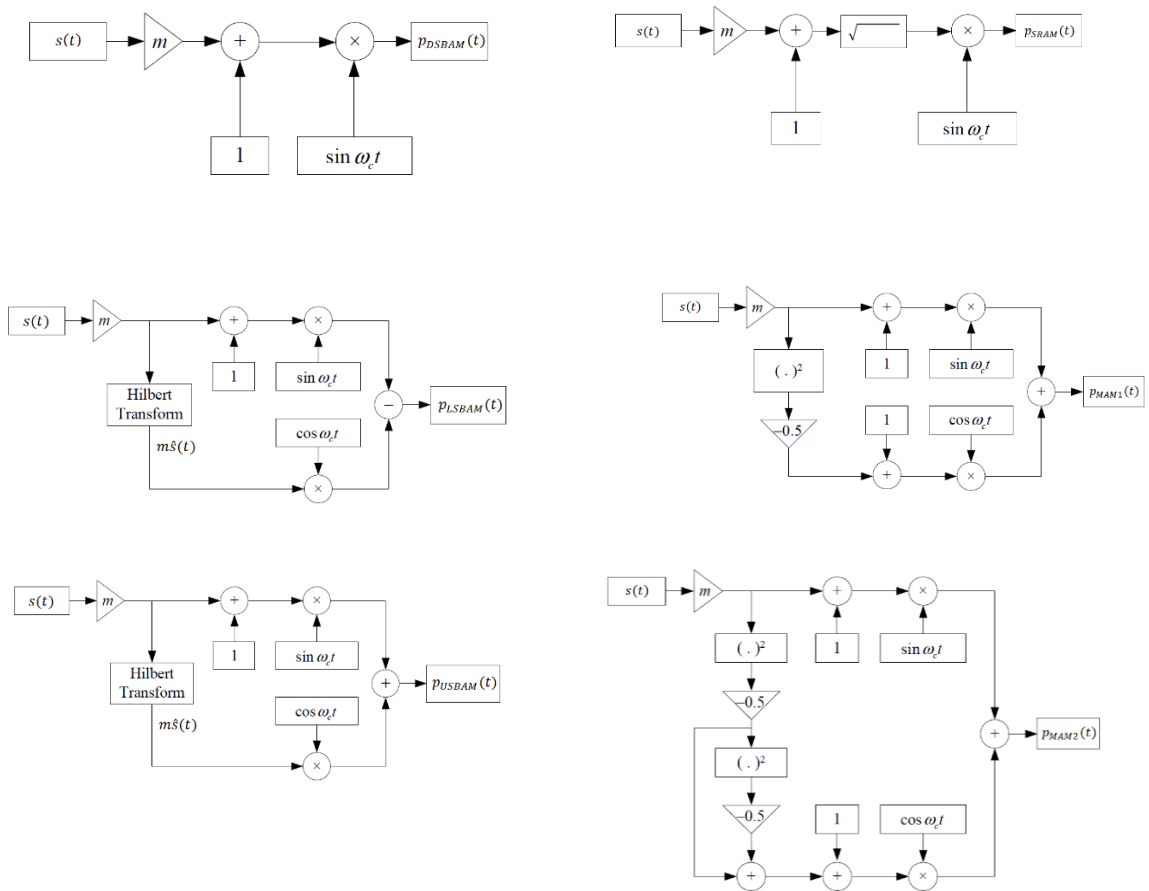

Supplementary Figure 1. Block diagrams of preprocessing amplitude modulation techniques: Double Side Band Amplitude Modulation (DSBAM), Lower Side Band Amplitude Modulation (LSBAM), Upper Side Band Amplitude Modulation (USBAM), Square Root Amplitude Modulation (SRAM), Modified Amplitude Modulation 1 (MAM1) and 2 (MAM2).

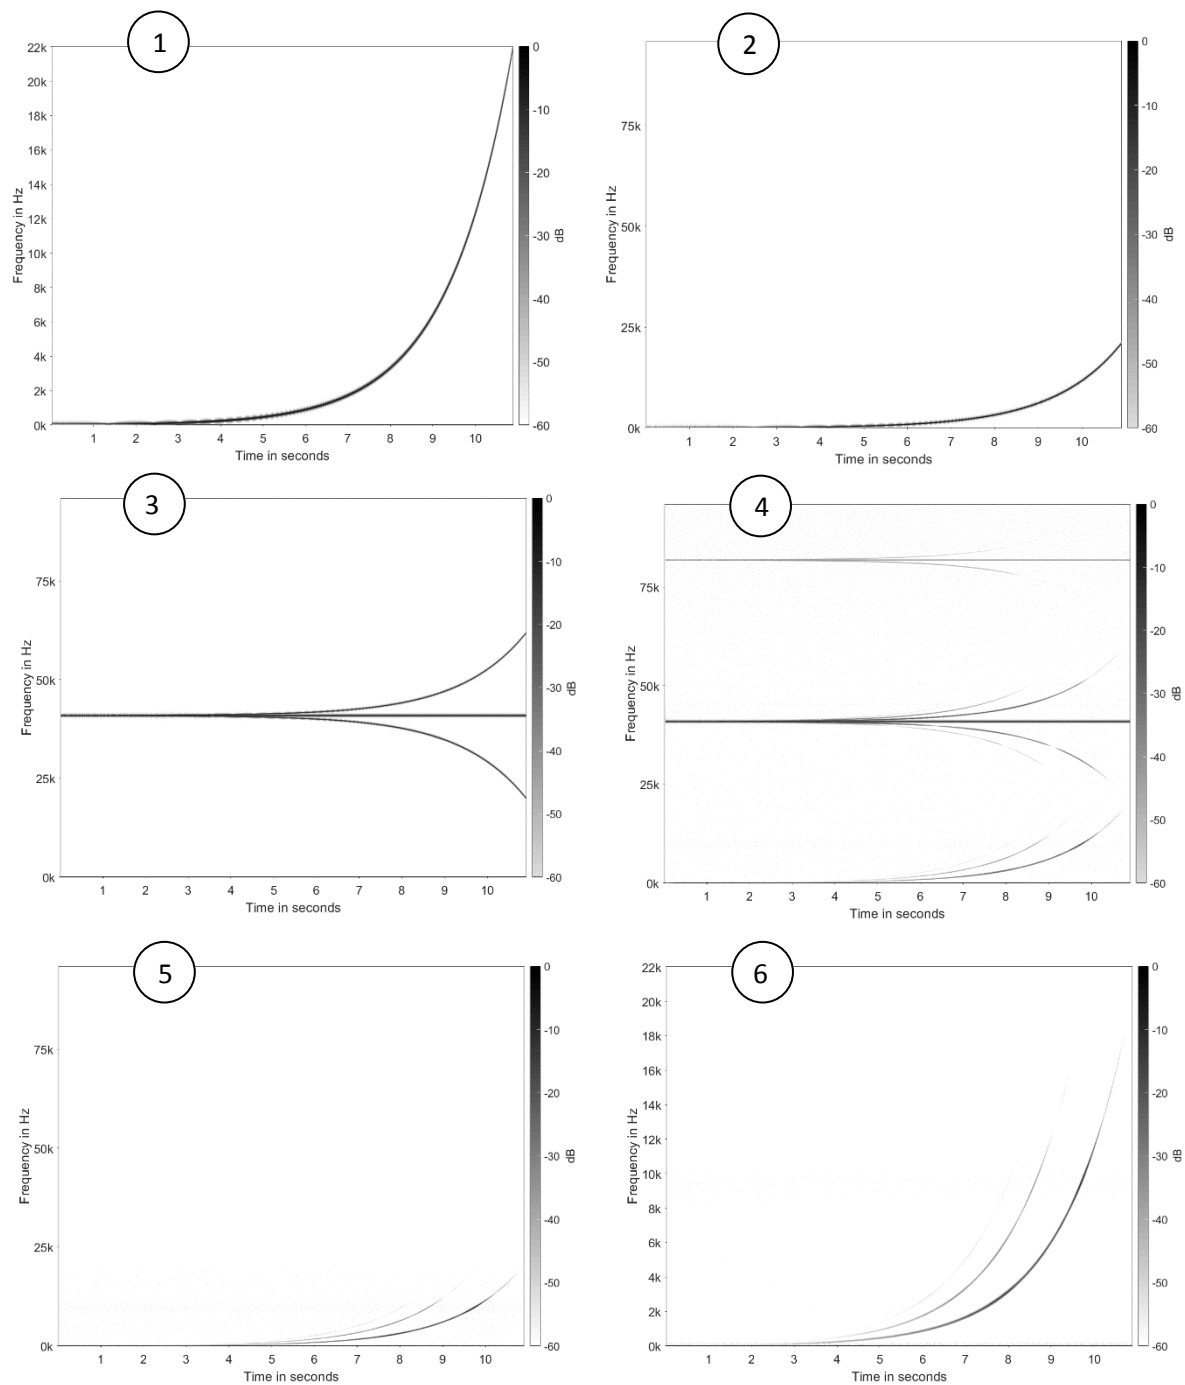

Supplementary Figure 2. Spectrogram of the signals corresponding to each stage of the measurement procedure.

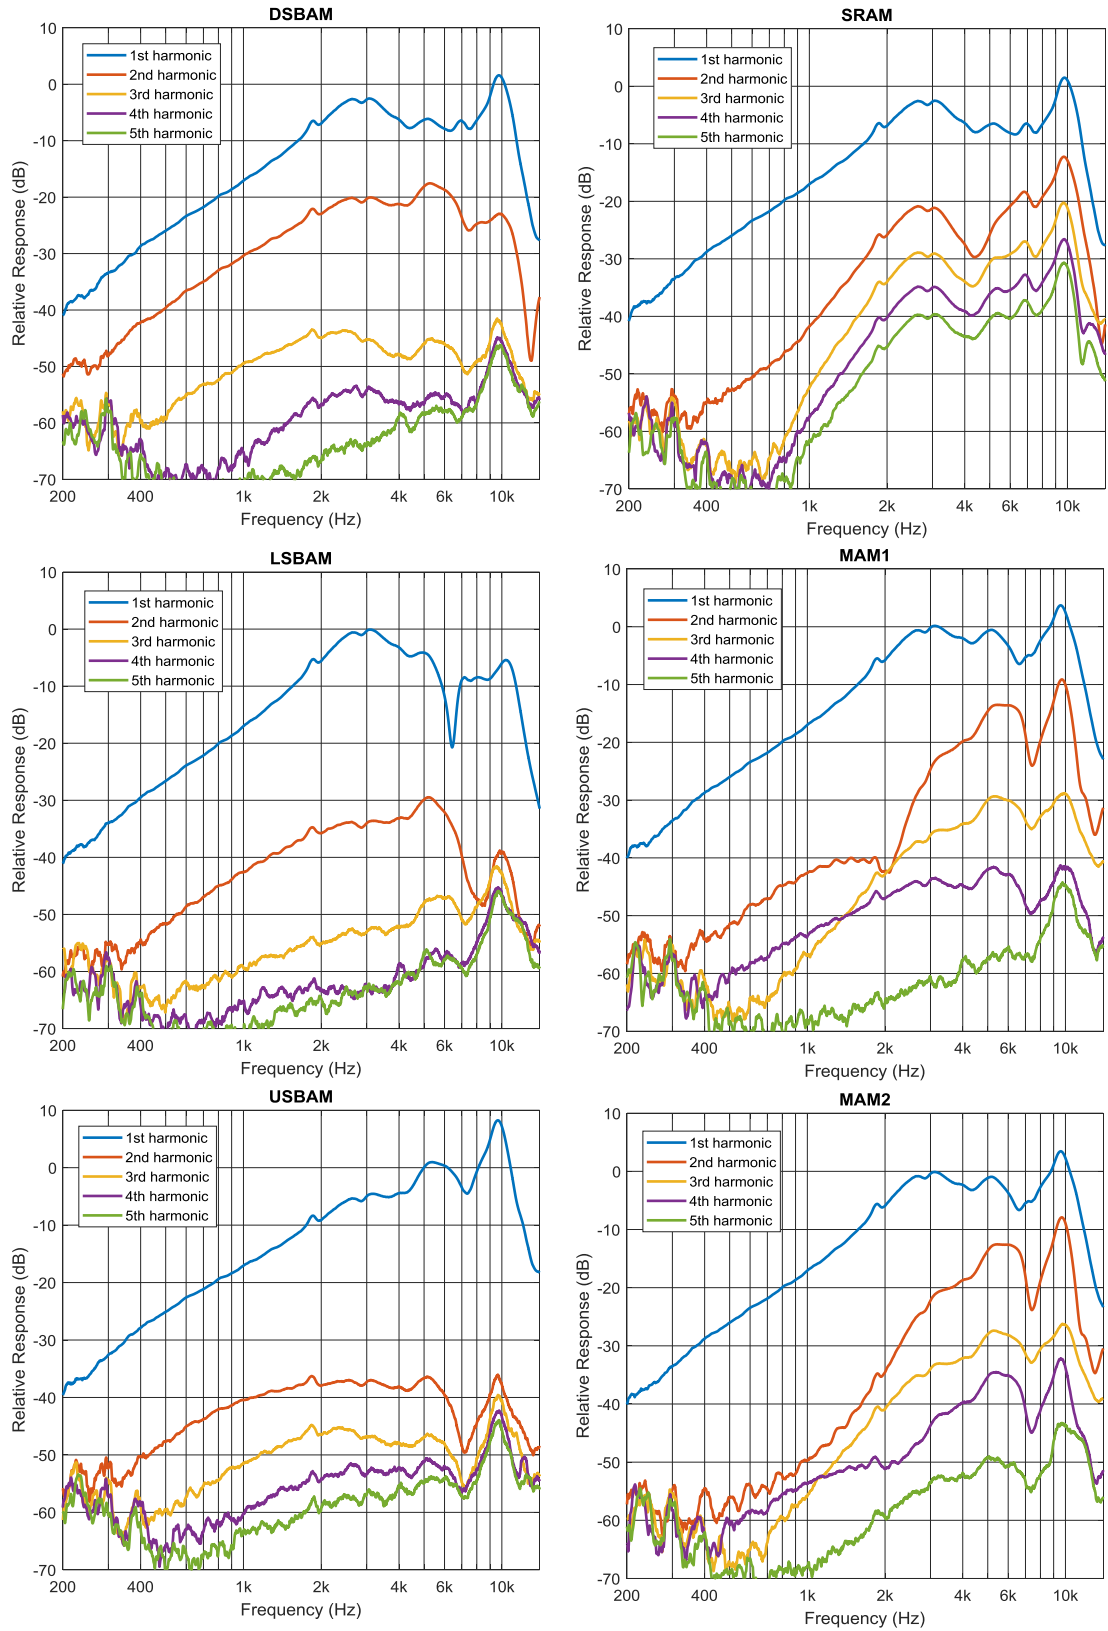

Supplementary Figure 3. Harmonics up to the 5<sup>th</sup> order measured with the predistortion techniques ( $m = 1$ )

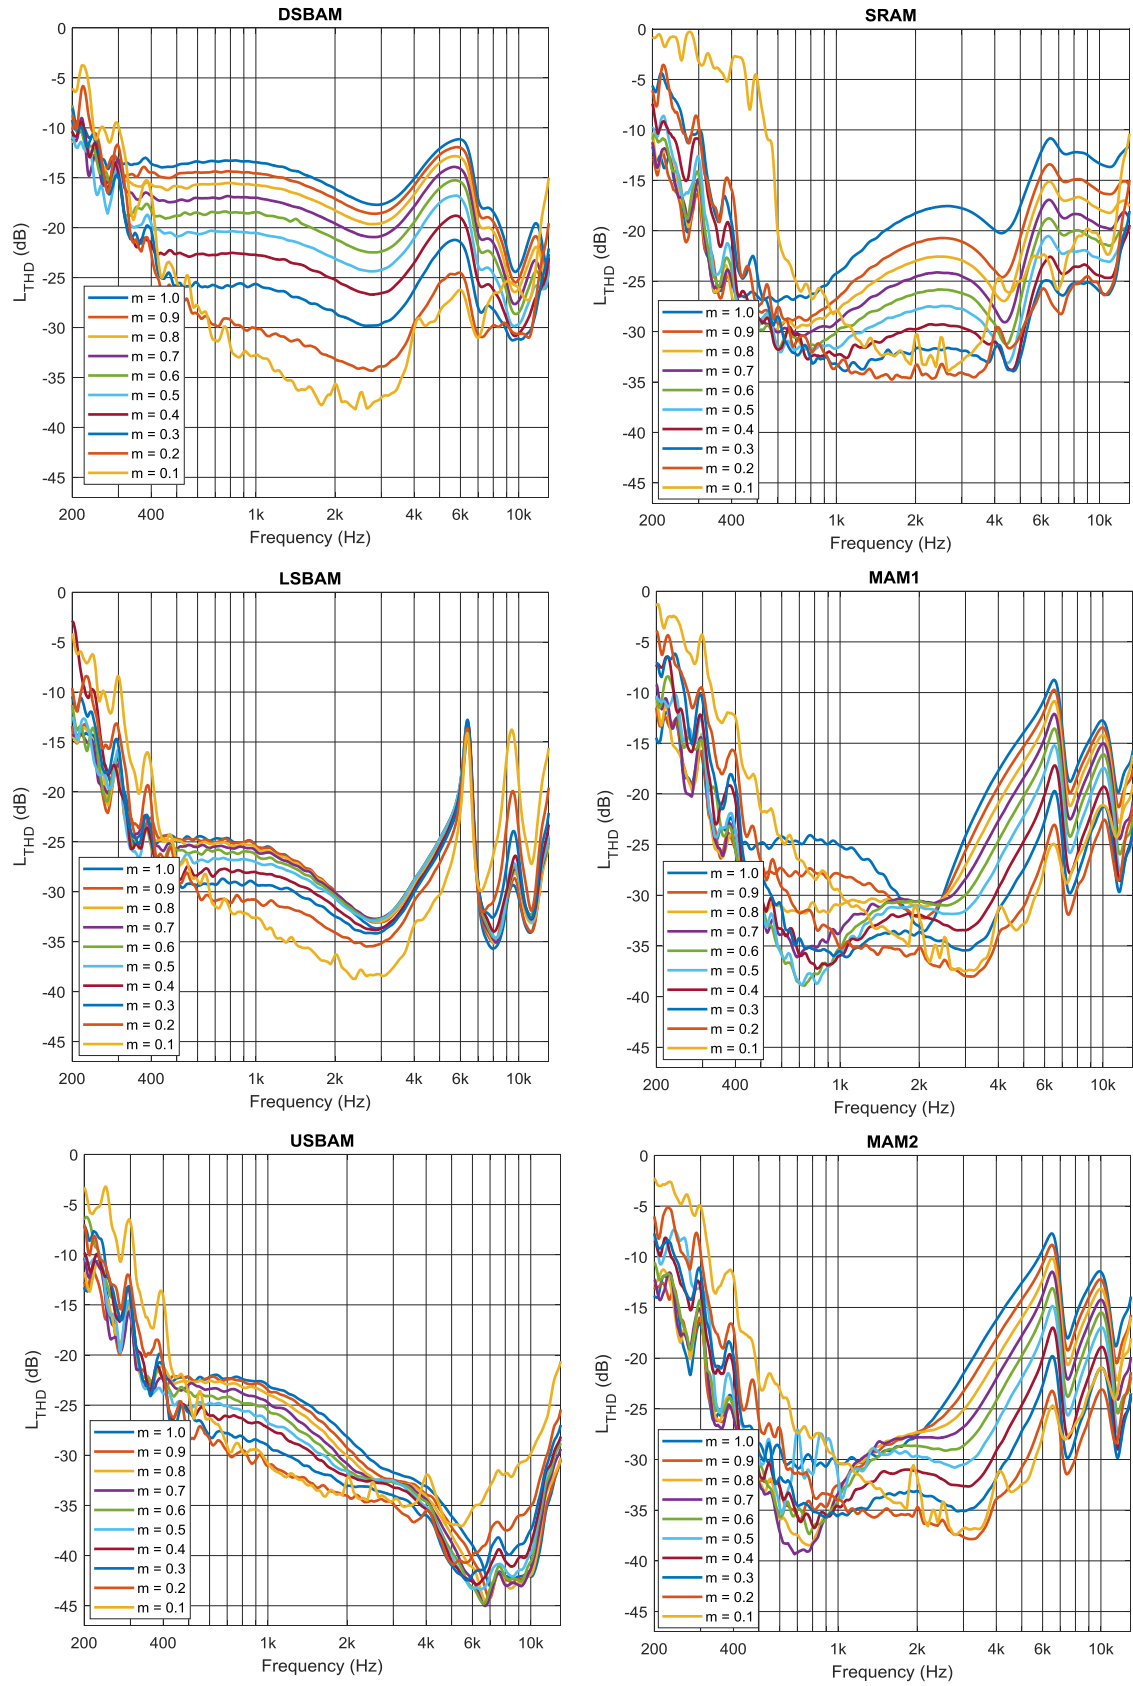

Supplementary Figure 4. Level of Total Harmonic Distortion ( $L_{THD}$ ) for the predistortion techniques at different modulation indices.

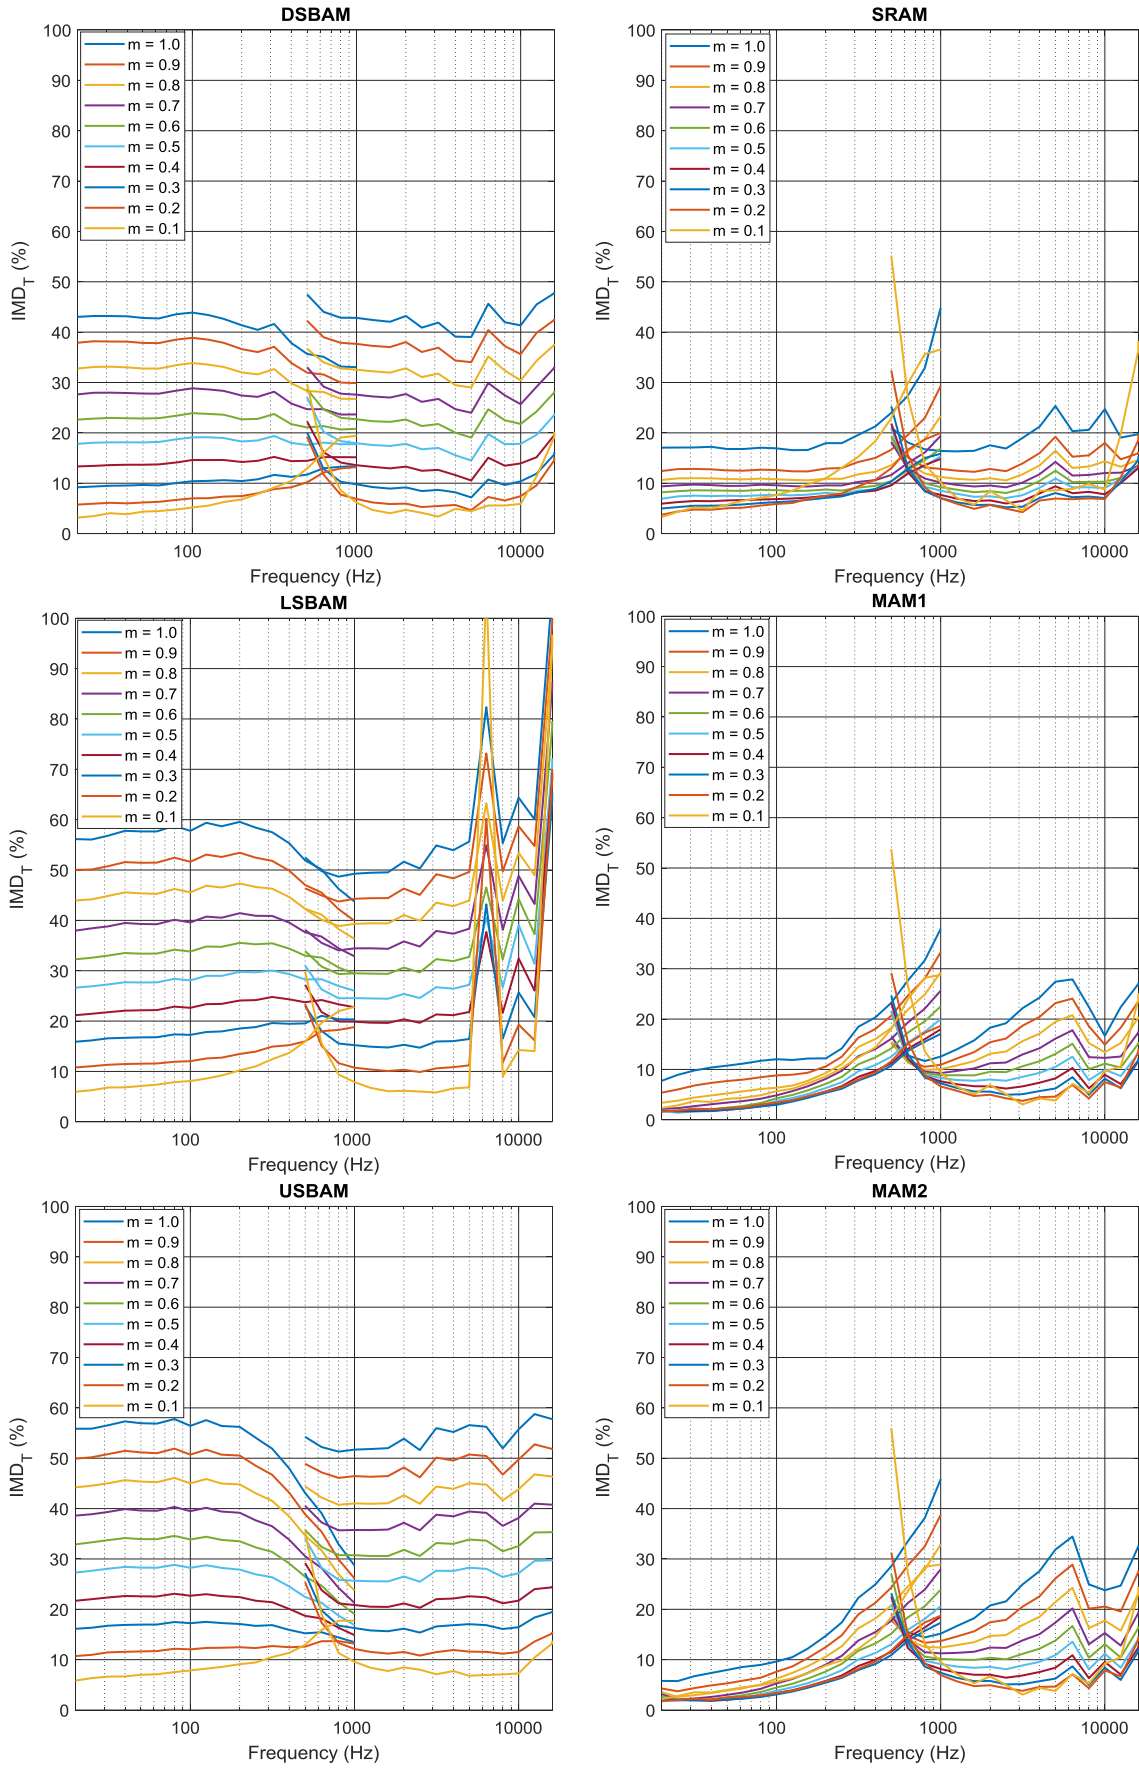

Supplementary Figure 5. Intermodulation Distortion ( $IMD_T$ ) for the predistortion techniques applied with different levels of modulation index ( $m$ ). The lines to the left of the discontinuity have their frequency combined with 60 Hz; the lines to the right are combined with a tone of 7 kHz.
